# Supplementary material for: Aptasensing of ciprofloxacin residue using graphene oxide modified with gold nanoparticles and branched polyethyleneimine
Source: Royal Society of Chemistry journal article supplement (doi:10.1039/d2ra02761e), 2022-01-01
Supplement: d2ra02761e1.pdf [file d2ra02761e1.pdf]

1 **Supporting information**

2

3

4 **Aptasensing of ciprofloxacin residue using graphene oxide modified by gold nanoparticle**  
5 **and branched polyethyleneimine**

6

7 Mansour Mahmoudpour <sup>a, b</sup>, Jafar Ezzati Nazhad Dolatabadi <sup>c</sup>, Mohammad Hasanzadeh <sup>a, d\*</sup>, Aziz  
8 Homayouni Rad <sup>b</sup>, Mohammadali Torbati <sup>b, \*\*</sup>, Farzad Seidi <sup>e</sup>

9

10

11 <sup>a</sup> Pharmaceutical Analysis Research Center, Tabriz University of Medical Sciences, Tabriz, Iran.

12 <sup>b</sup> Department of Food Science and Technology, Faculty of Nutrition and Food Sciences, Nutrition  
13 Research Center, Tabriz University of Medical Sciences, Tabriz, Iran.

14 <sup>c</sup> Drug Applied Research Center, Tabriz University of Medical Sciences, Tabriz, Iran.

15 <sup>d</sup> Nutrition Research Center, Tabriz University of Medical Sciences, Tabriz, Iran.

16 <sup>e</sup> Jiangsu Co-Innovation Center for Efficient Processing and Utilization of Forest Resources and  
17 International Innovation Center for Forest Chemicals and Materials, Nanjing Forestry University,  
18 Nanjing 210037, China.

19

20

21

22 **Corresponding authors:**

23 \* Mohammad Hasanzadeh,

24 E-mail: [hasanzadehm@tbzmed.ac.ir](mailto:hasanzadehm@tbzmed.ac.ir)

25 \*\* Mohammadali Torbati,

26 E-mail: [torbatima@yahoo.com](mailto:torbatima@yahoo.com)

27

28

29

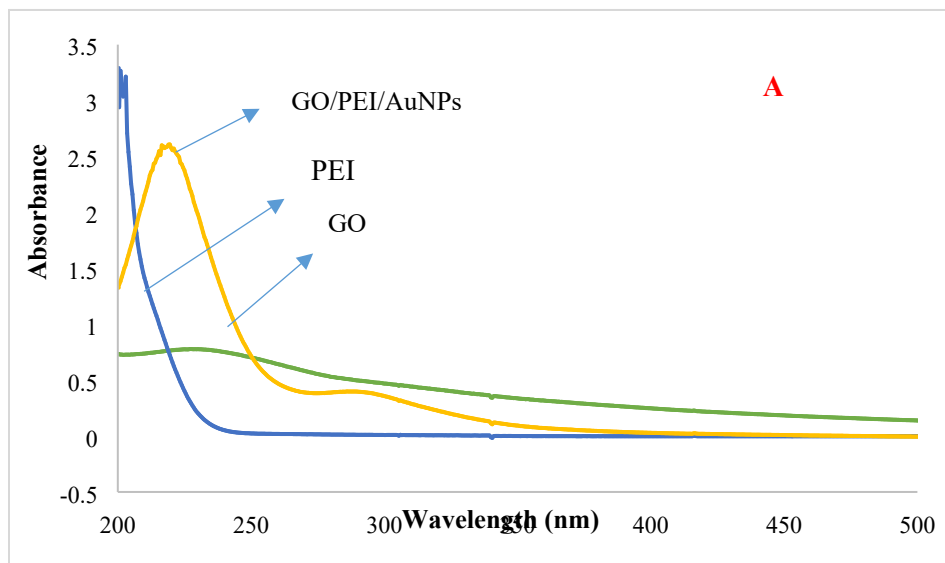

30

31

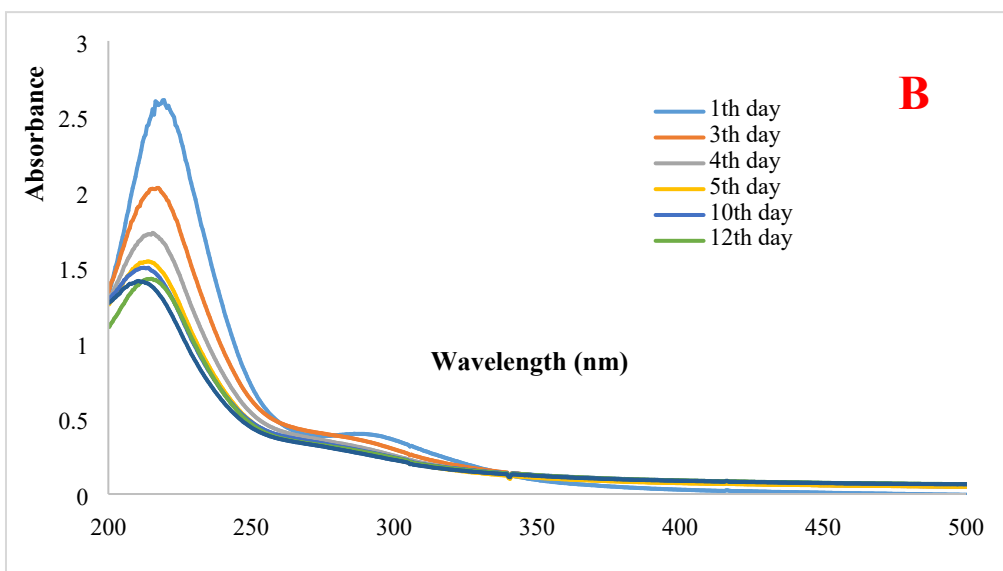

32

33 **Fig. S1 A)** UV-Vis absorbance of the GO, PEI, and GO-PEI-AuNPs nanocomposite. **B)** UV-Vis of GO-  
34 PEI-AuNPs nanocomposite in various time of storage (1-12 days).

35

36

37

38

39

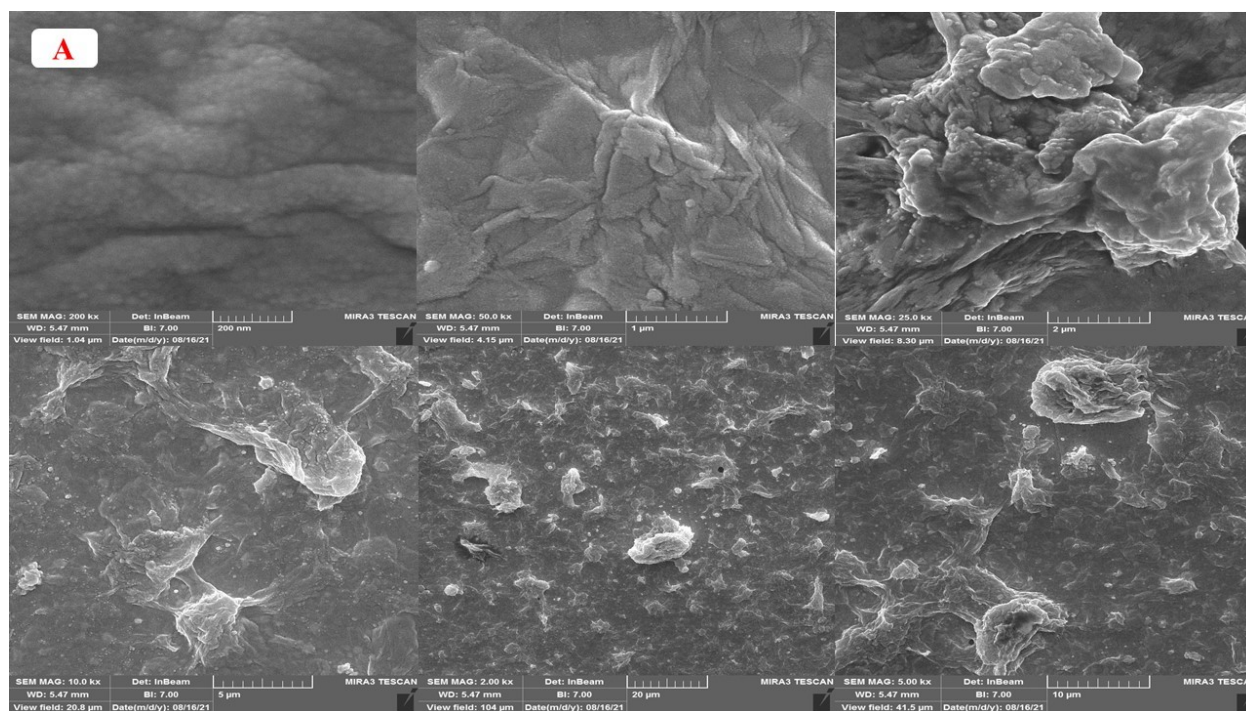

40

41

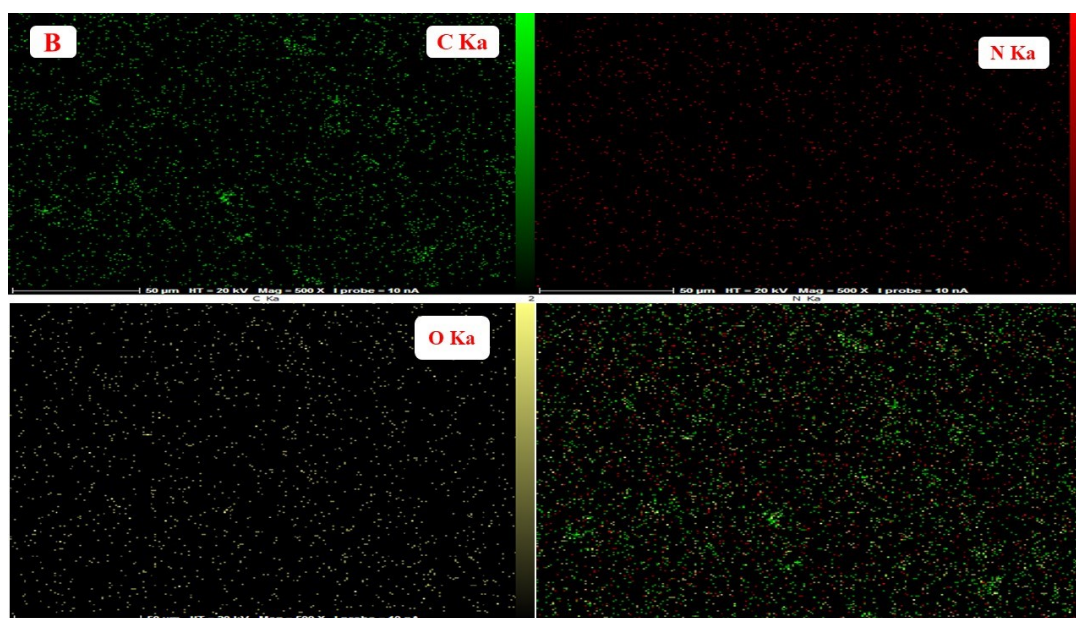

42

43 Fig. S2. A, B. FE-SEM with MAP images of GO-PEI-AuNPs/AuE surface with different magnifications.

44

45

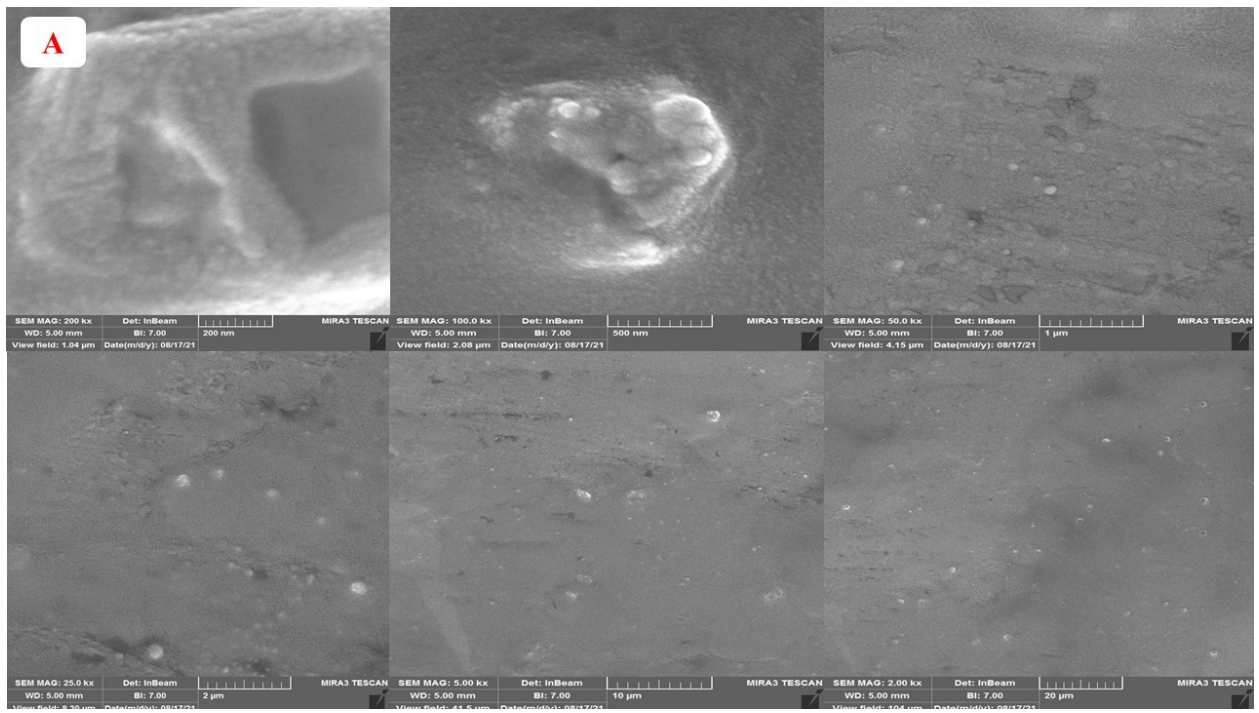

46  
47

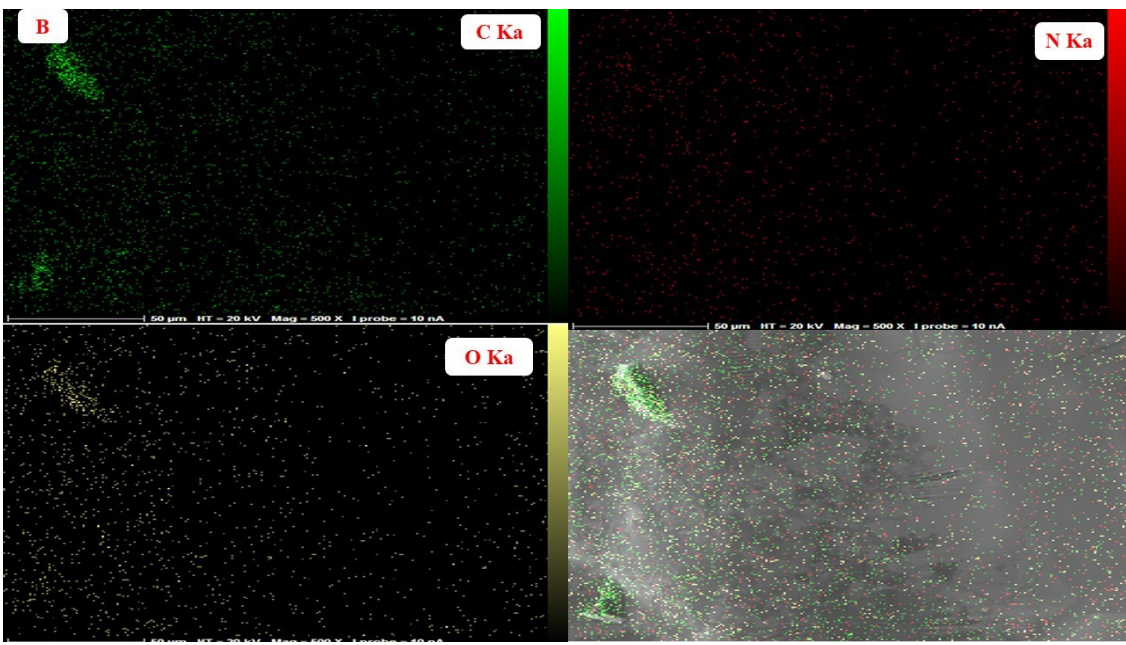

48  
49  
50  
51  
52

**Fig. S3, A, B.** FE-SEM with MAP images of Apt/GO-PEI-AuNPs/AuE with various magnifications.



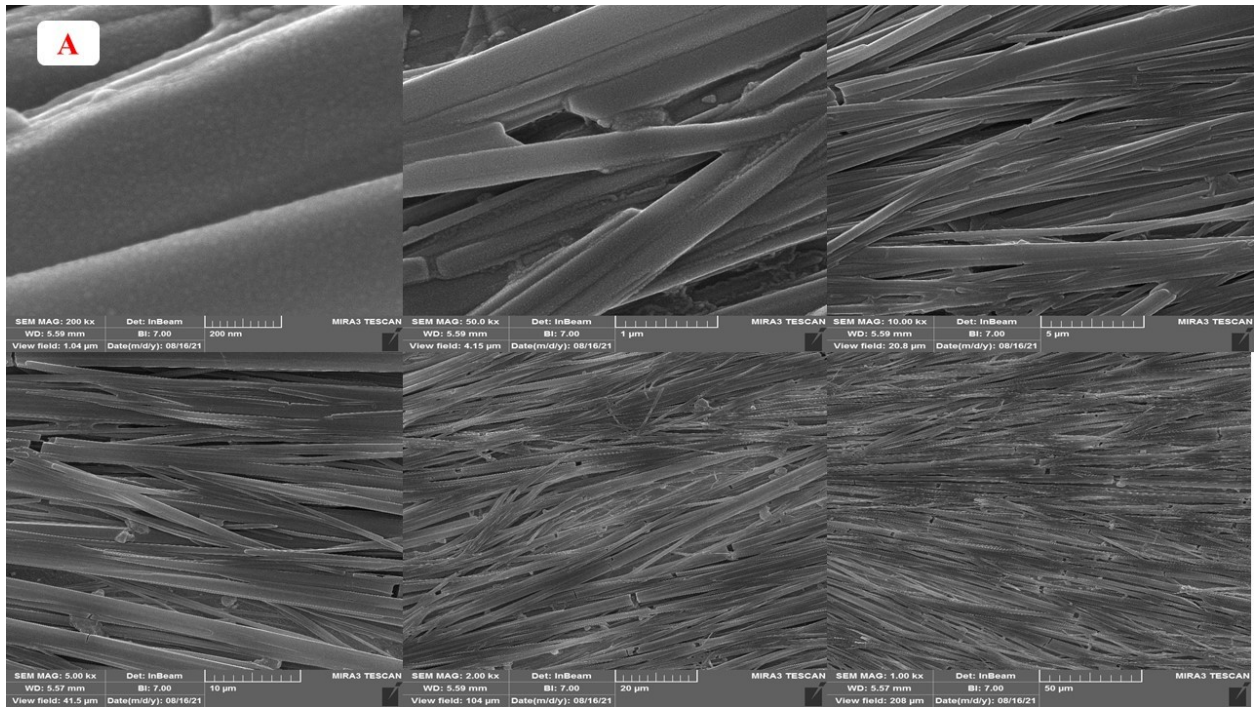

53

54

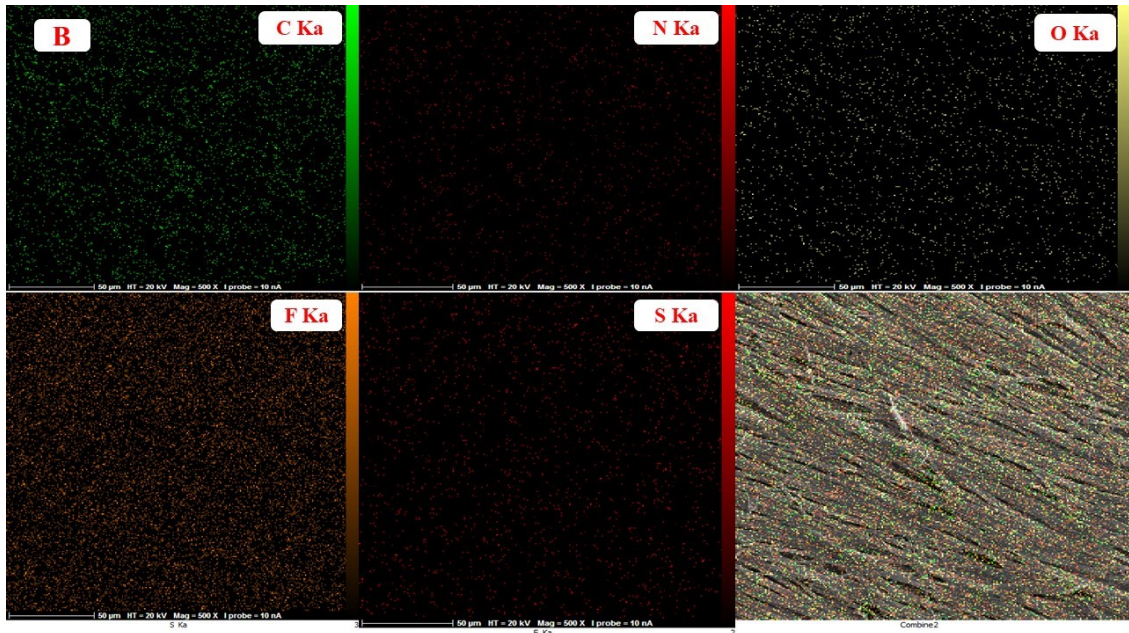

55

56 **Fig. S4, A, B.** FE-SEM with MAP images of CFX/Apt/GO-PEI-AuNPs/AuE with various magnifications.

57

58

59

60

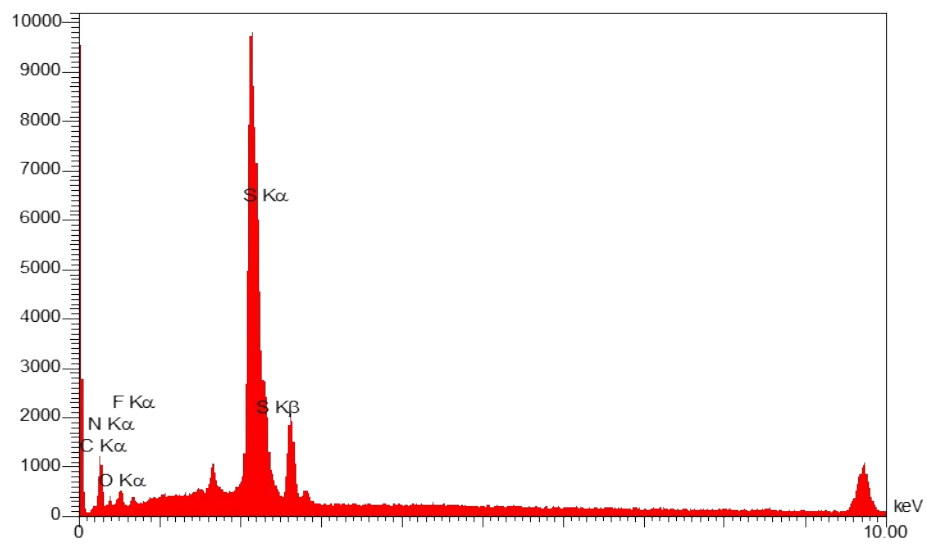

61

62

63 **Fig. S5.** EDS result of CFX/MCH/Apt/GO-PEI-AuNPs/AuE

64

65

66

67

68

69

70

71

72

73

74

75

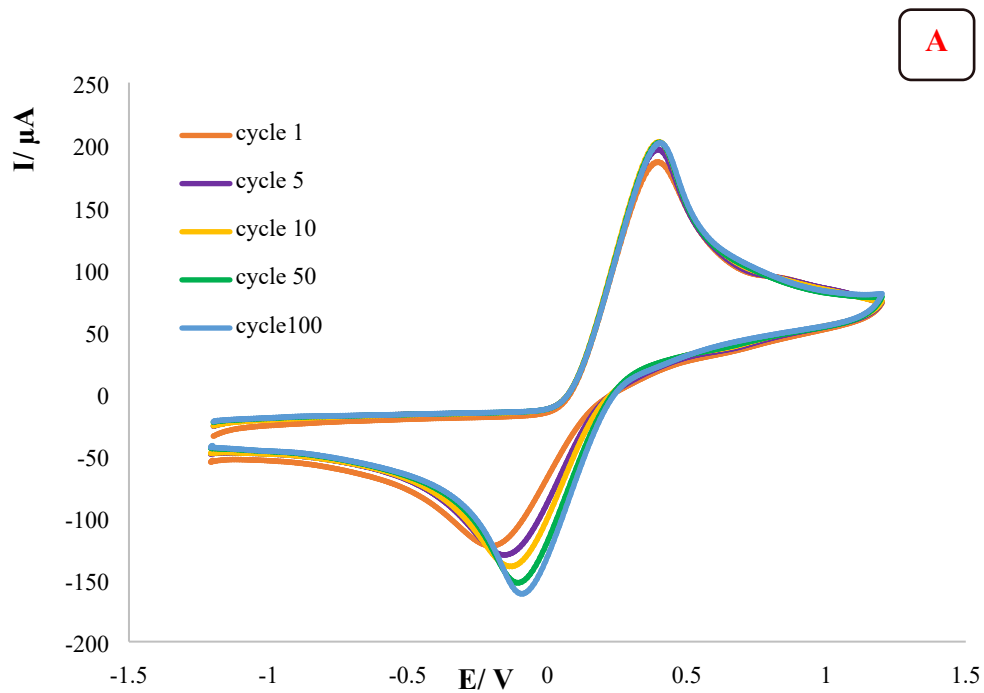

76

77

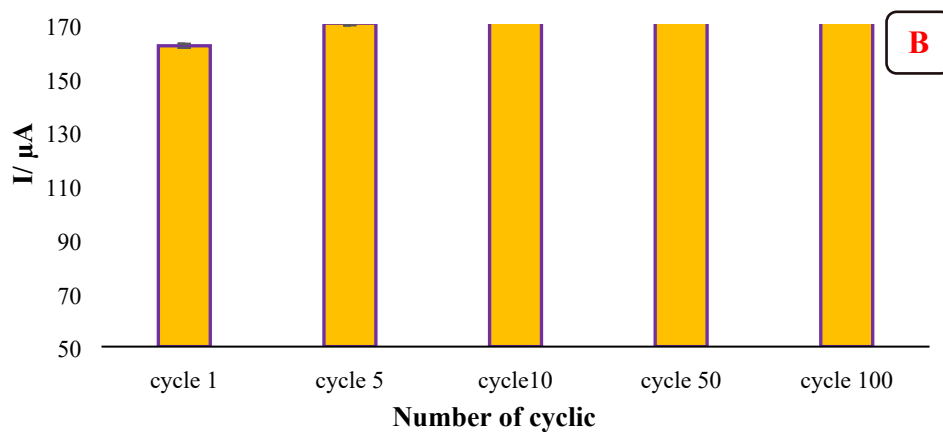

78

79 **Fig. S5. (A)** CVs of GO-PEI-AuNPs/AuE in the potential range of -1.2 to +1.2V and sweep rate of 100

80 mV/s in various cycles 1, 5, 10, 50, 100 cycles in 0.01 M of  $K_3Fe(CN)_6$  (0.1M KCl) solution, **B)**

81 Histograms of peak current versus number of cyclic.

82

83

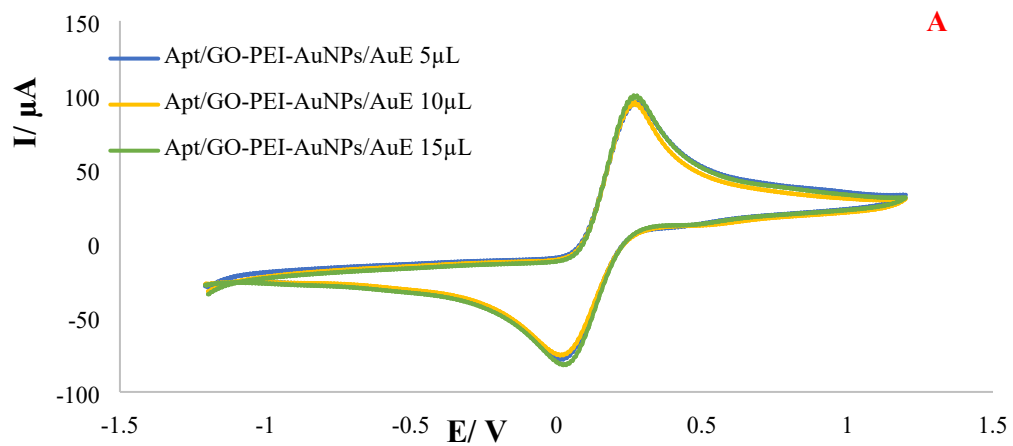

84

85

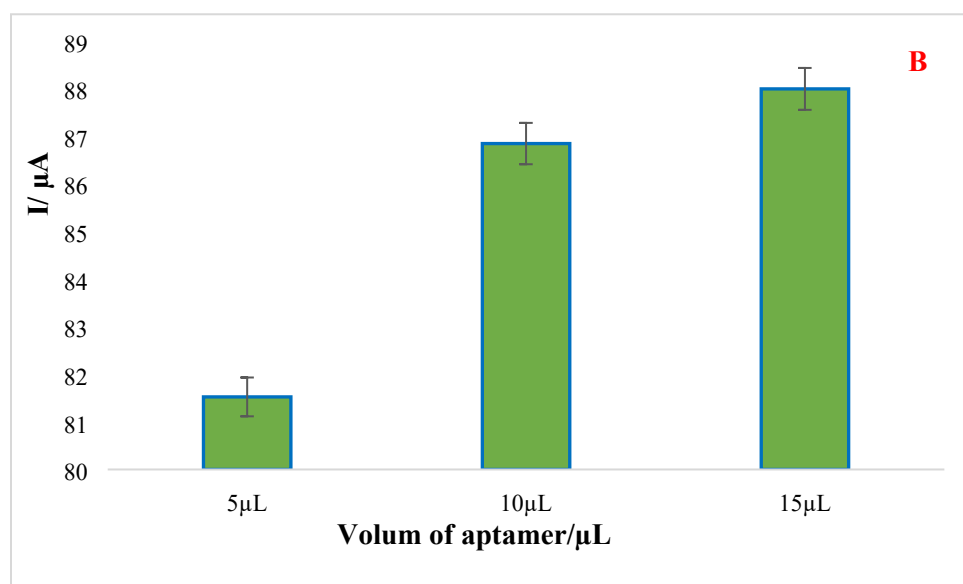

86

87

88

89

90



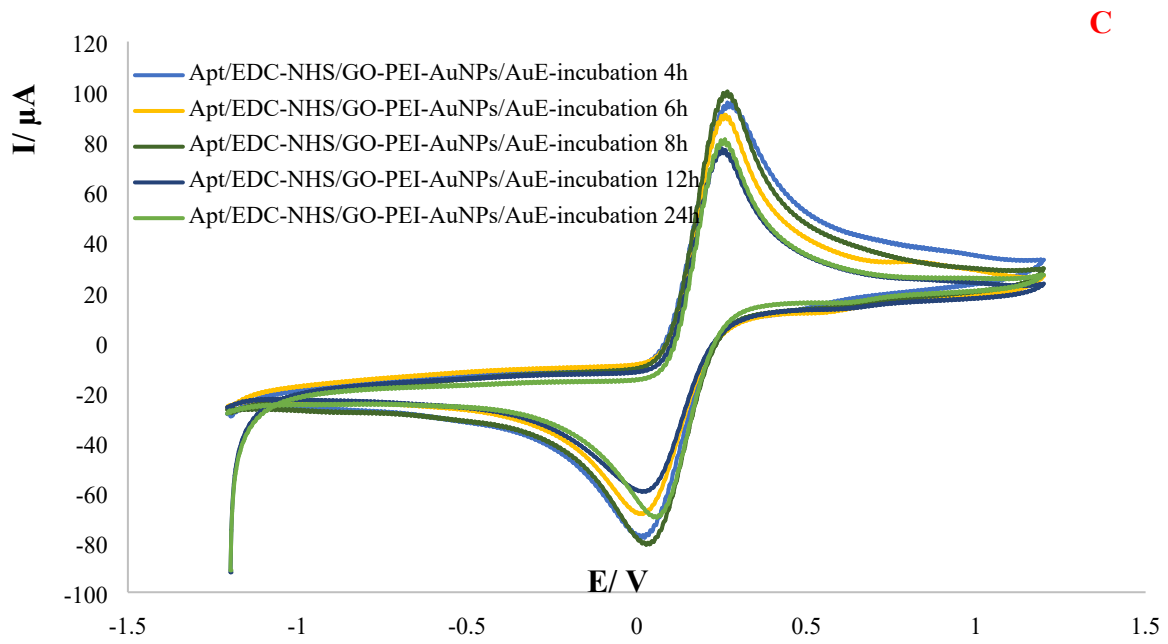

91

92

93

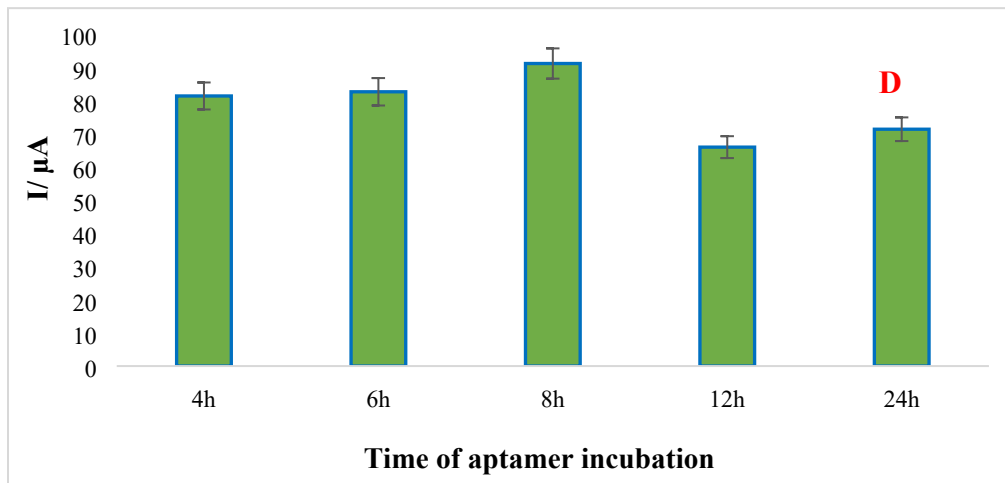

94

95

96

97

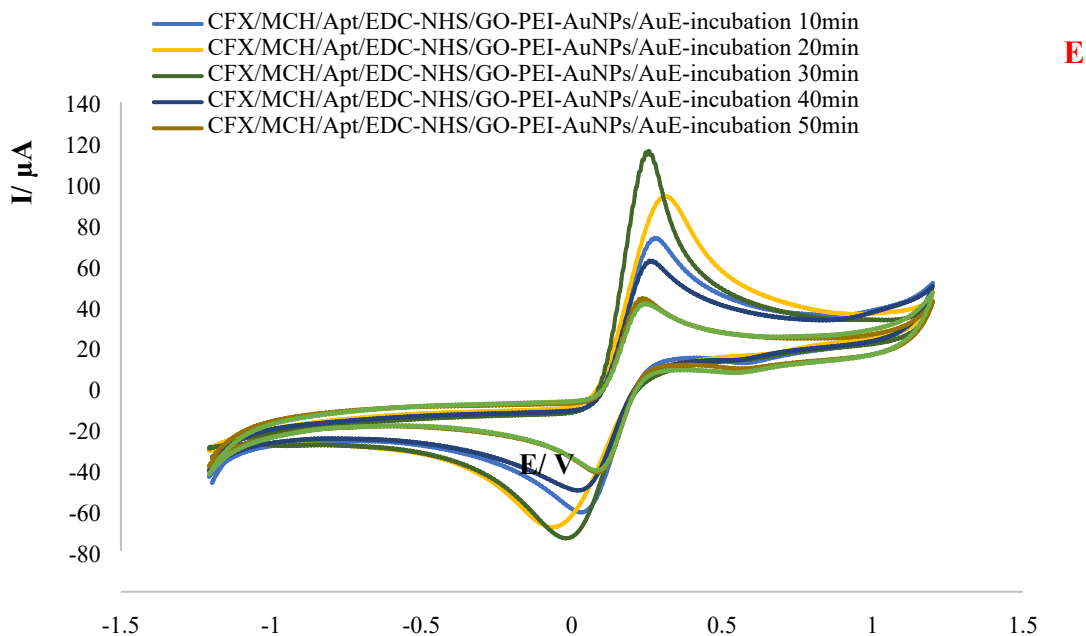

98

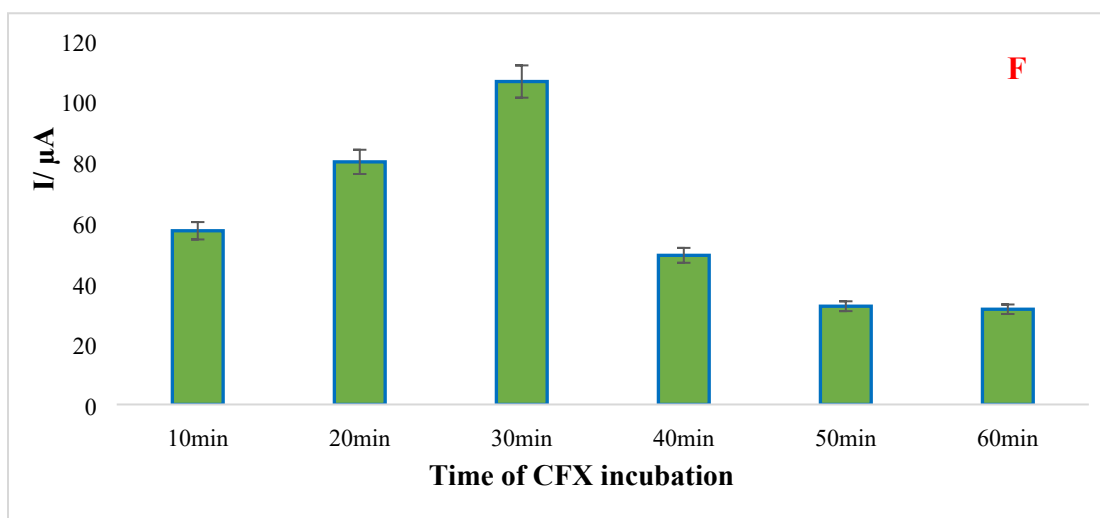

99

100 **Fig. S6.** **A)** CVs of GO-PEI-AuNPs/AuE after attachment of aptamer with various volume of aptamer (5,  
 101 10, and 15μL) **B)** Histogram of peak current versus aptamer volume. **C)** CVs of Apt/GO-PEI-AuNPs/AuE  
 102 in different incubation time of aptamer (4, 6, 8, 12, and 24 h), **D)** Histogram of peak current based on  
 103 incubation time of aptamer on the surface of GO-PEI AuNPs/AuE. **E)** CVs of MCH/Apt/GO-PEI-  
 104 AuNPs/AuE in diverse time (10, 20, 30, 40, 50 and 60 min) after CFX incubation, **F)** Histogram of peak  
 105 current versus incubation time of CFX on the modified AuE surface.

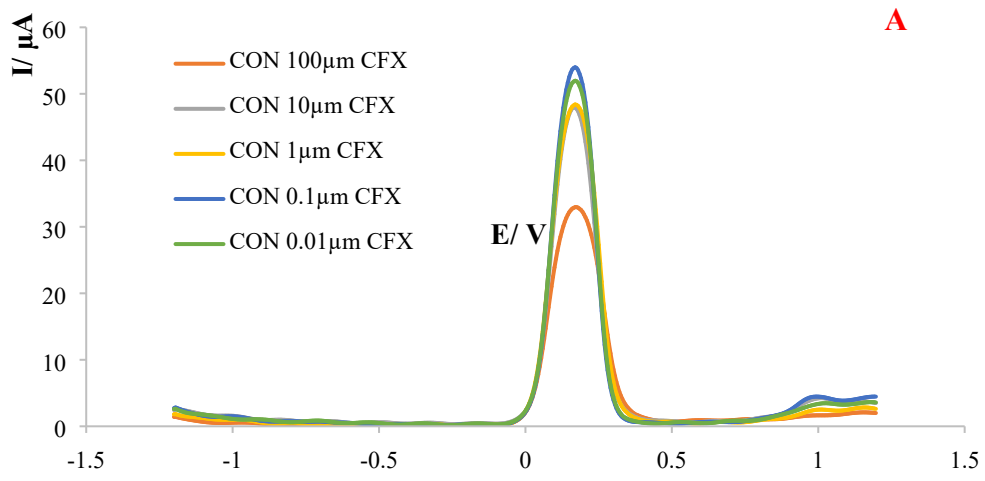

106

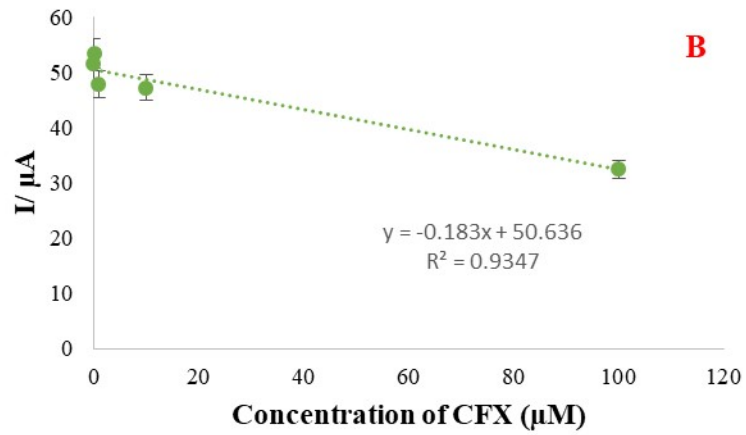

107

108

109

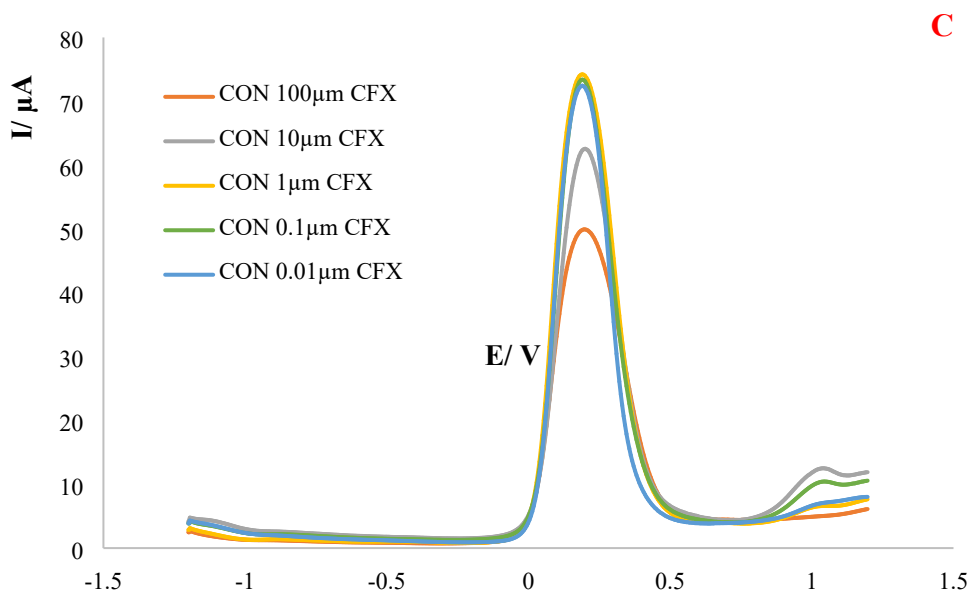

C

110

111

112

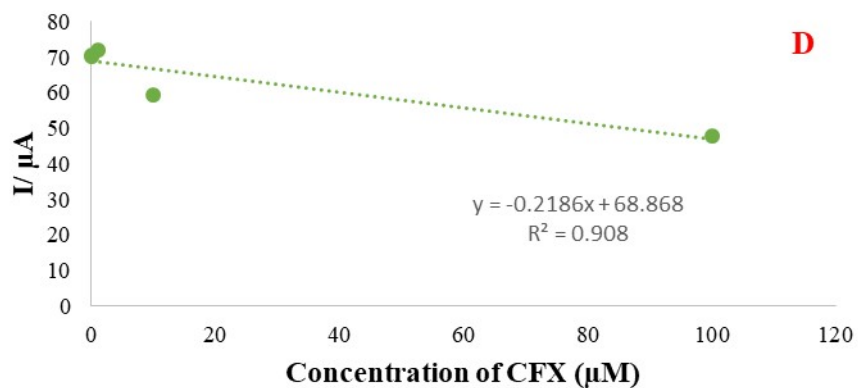

D

113

114

115 **Fig. S7.** (A, C) DPVs and SWVs of MCH/Apt/EDC-NHS/GO-PEI-AuNPs/AuE proposed aptamer assay  
 116 in the CFX presence (100, 10, 1, 0.1, 0.01 μM) on potential range of -1.2 to +1.2 V. Supporting electrolyte  
 117 is 0.01 M of  $K_3Fe(CN)_6$  (0.1M KCl). (B, D) DPV and SWV calibration curve of CFX determination in  
 118 different concentration.

119

120

121

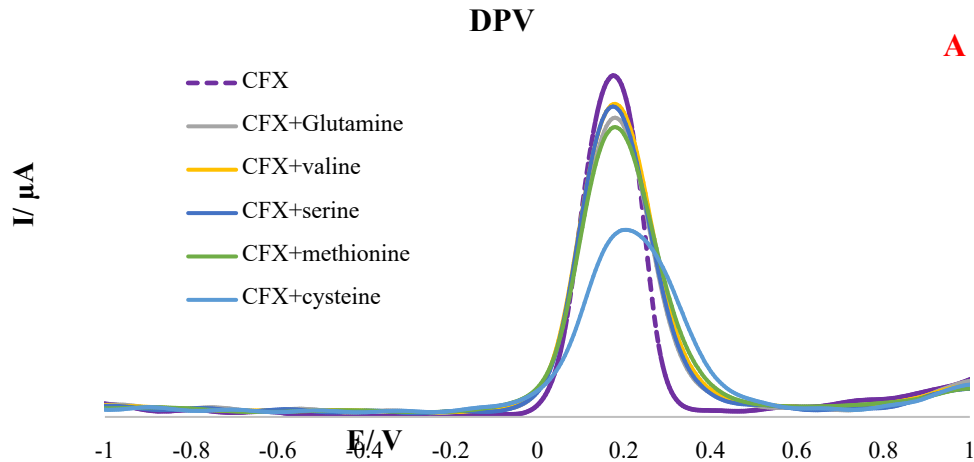

122

123

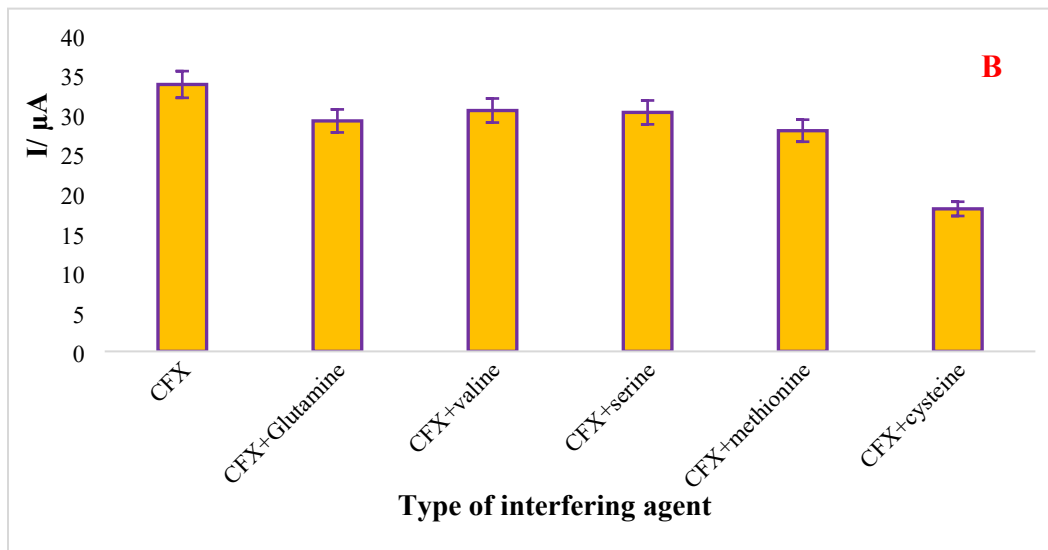

124

125

126 **Fig. S8.** (A) DPVs of MCH/Apt/GO-PEI-AuNPs/AuE established aptasensor in the existence of some  
127 interfering species (serine, valine, cysteine, methionine, and glutamine) in the solution of 0.01 M of  
128  $K_3Fe(CN)_6$  (0.1M KCl). (B) Histogram of peak current versus various kind of interfering agent.

129

130

131



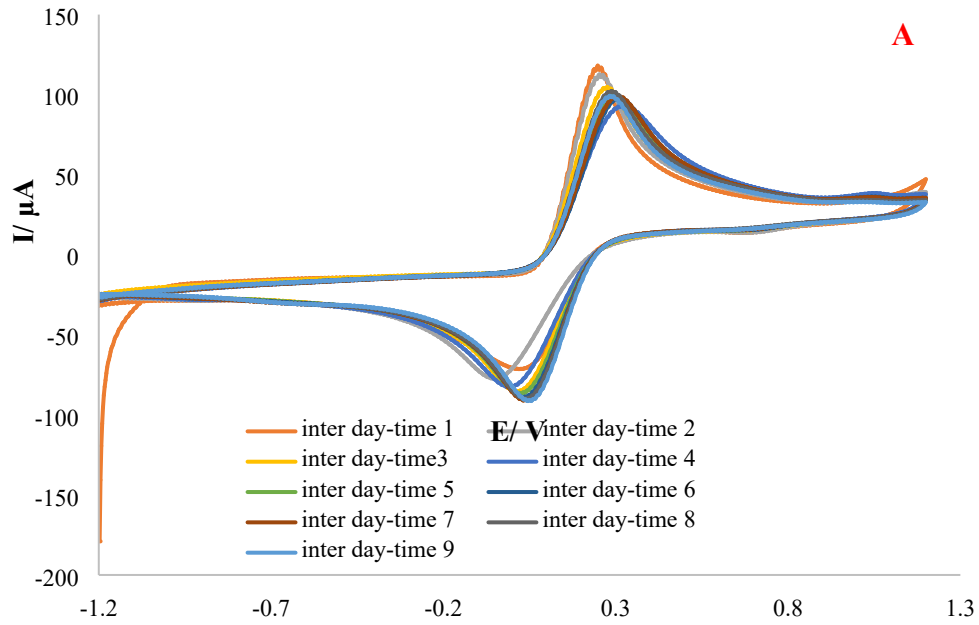

132

133

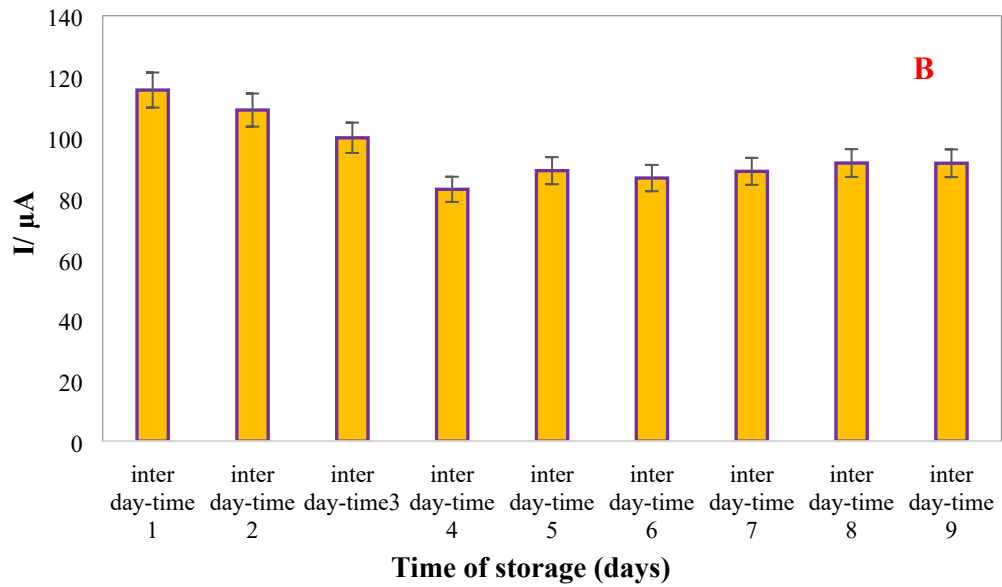

134

135

136

137

138

139

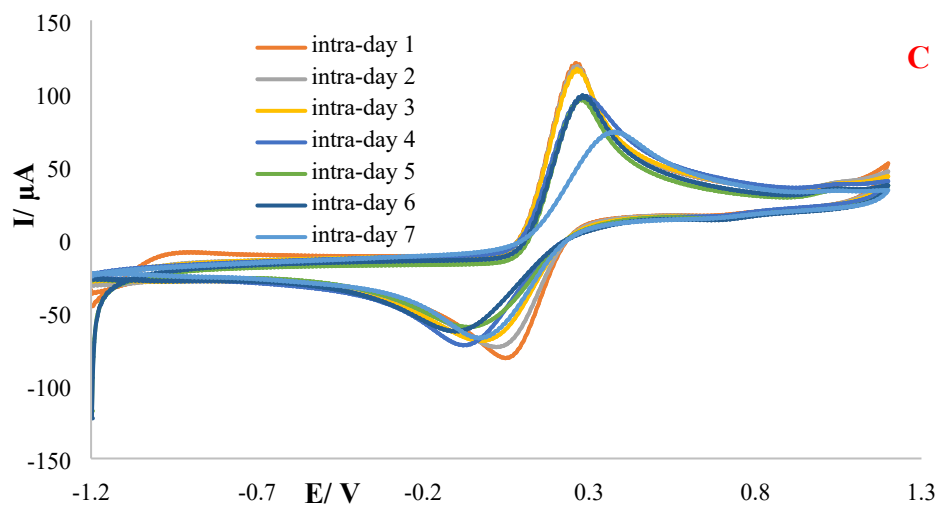

**C**

140

141

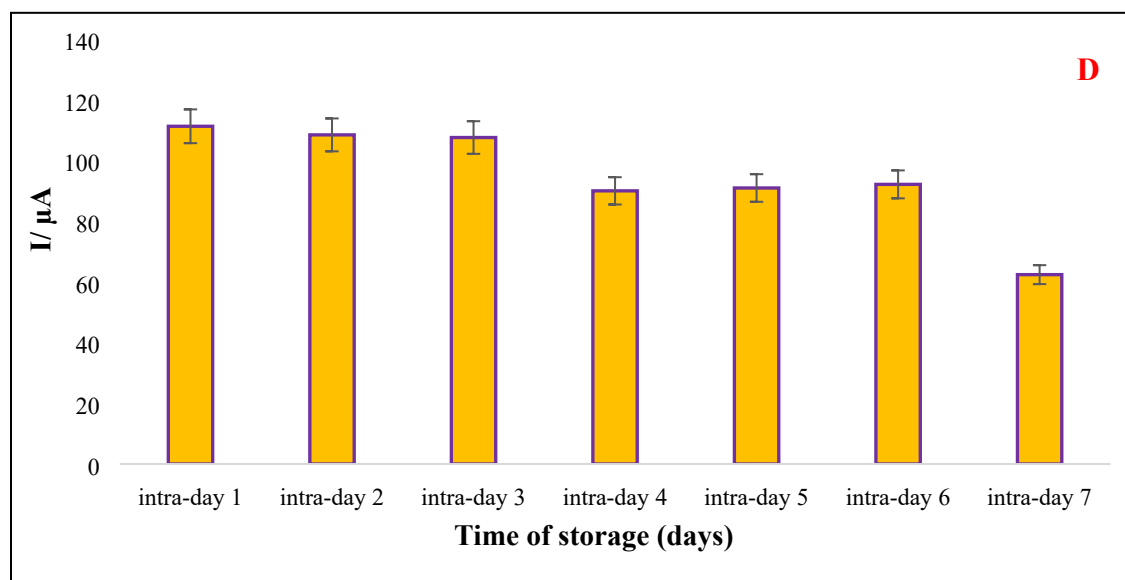

**D**

142

143

144 **Fig. S9.** (A, C) The CVs of Apt/EDC-NHS/GO-PEI-AuNPs/AuE suggested probe to study the inter and  
 145 intra-day stability in 0.01 M of  $K_3Fe(CN)_6$  (0.1M KCl) solution. (B, D) Histogram of peak current based  
 146 on different storage time via CV technique. (SD-2.06, n=3).
